# Supplementary material
Source: PubMed Central journal article supplement (PMC4120867)
Supplement: NIHMS607477-supplement-01.pdf [file NIHMS607477-supplement-01.pdf]

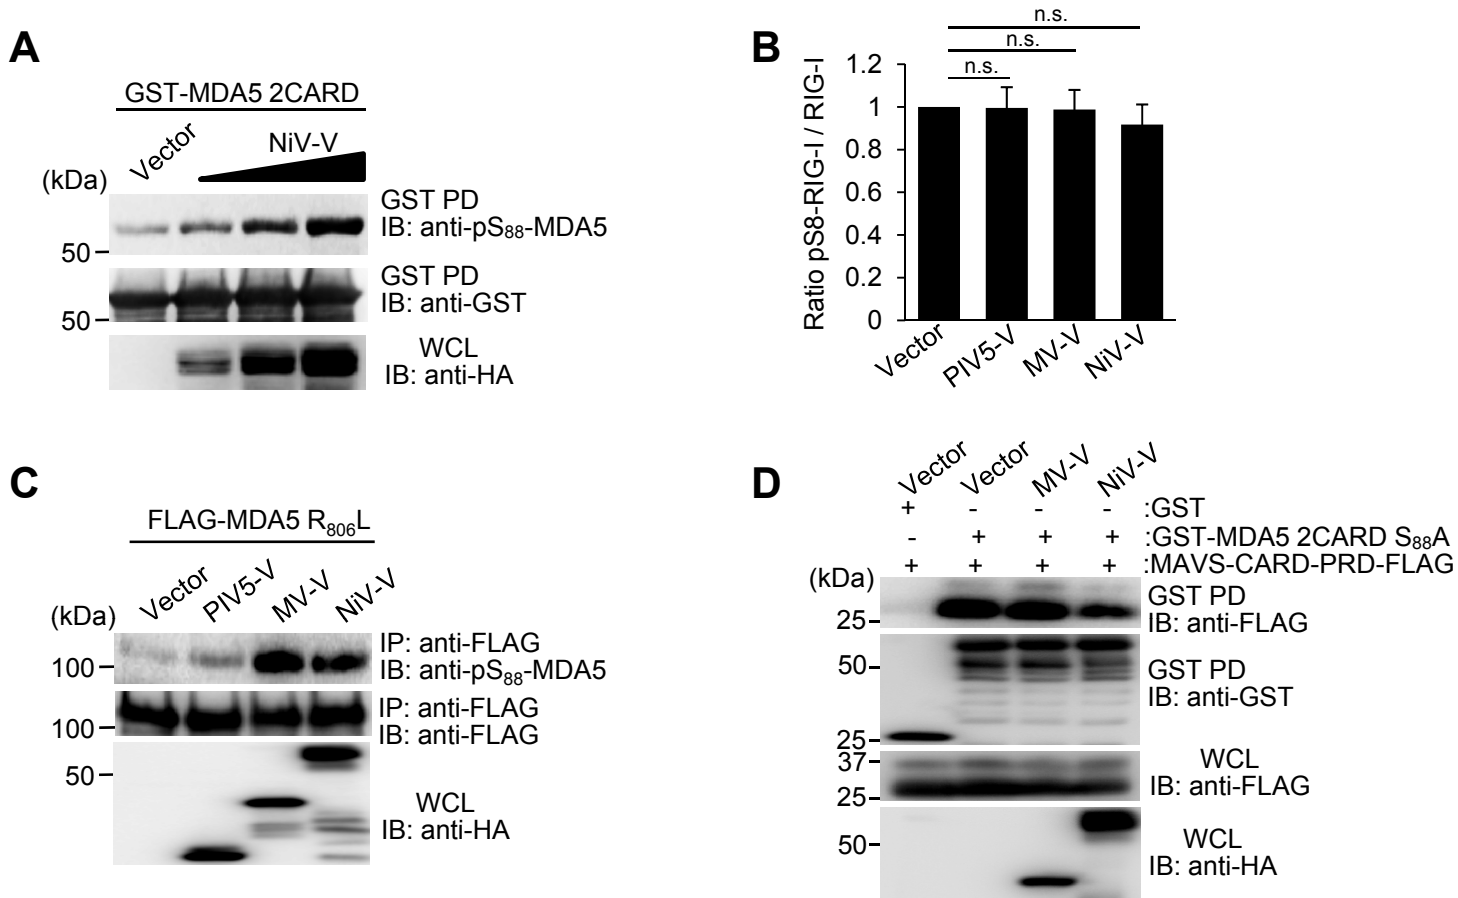

**Figure S1 related to Figure 1. (A) NiV-V inhibits MDA5 dephosphorylation in a dose-dependent manner.** HEK293T cells were transfected with GST-MDA5 2CARD and increasing amounts of HA-tagged NiV-V. WCLs were subjected to GST pull-down (GST PD), followed by IB with anti-pS<sub>88</sub>-MDA5 or anti-GST antibody. **(B) Densitometric quantification of RIG-I S8 phosphorylation upon V protein expression.** The intensities of the bands from the Western blots shown in Figure 1F (first and second panels) were quantified by densitometric analysis. The extent of RIG-I S8 phosphorylation was calculated as the ratio of the amount of phosphorylated FLAG-RIG-I (first panel) to the amount of total FLAG-RIG-I (second panel). Values were normalized to control (FLAG-RIG-I cotransfected with vector). Data are the means +/- s.d. of three independent experiments. n.s., statistically not significant. **(C) MV-V and NiV-V robustly enhance the phosphorylation of MDA5 R<sub>806</sub>L.** HEK293T cells were transfected with FLAG-MDA5 R<sub>806</sub>L together with empty vector or the indicated HA-tagged paramyxovirus V proteins. WCLs were subjected to FLAG-IP, followed by IB with anti-pS<sub>88</sub>-MDA5 or anti-FLAG antibody. **(D) MV-V and NiV-V do not inhibit MAVS binding of a MDA5 S<sub>88</sub>A mutant.** HEK293T cells were transfected with MAVS-CARD-PRD-FLAG and GST or GST-MDA5 2CARD S<sub>88</sub>A together with vector, MV-V, or NiV-V. WCLs were subjected to GST PD, followed by IB with anti-FLAG or anti-GST antibody.

**A**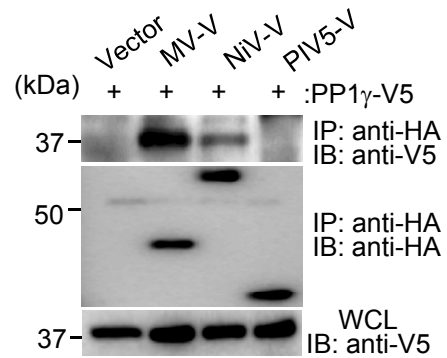**B**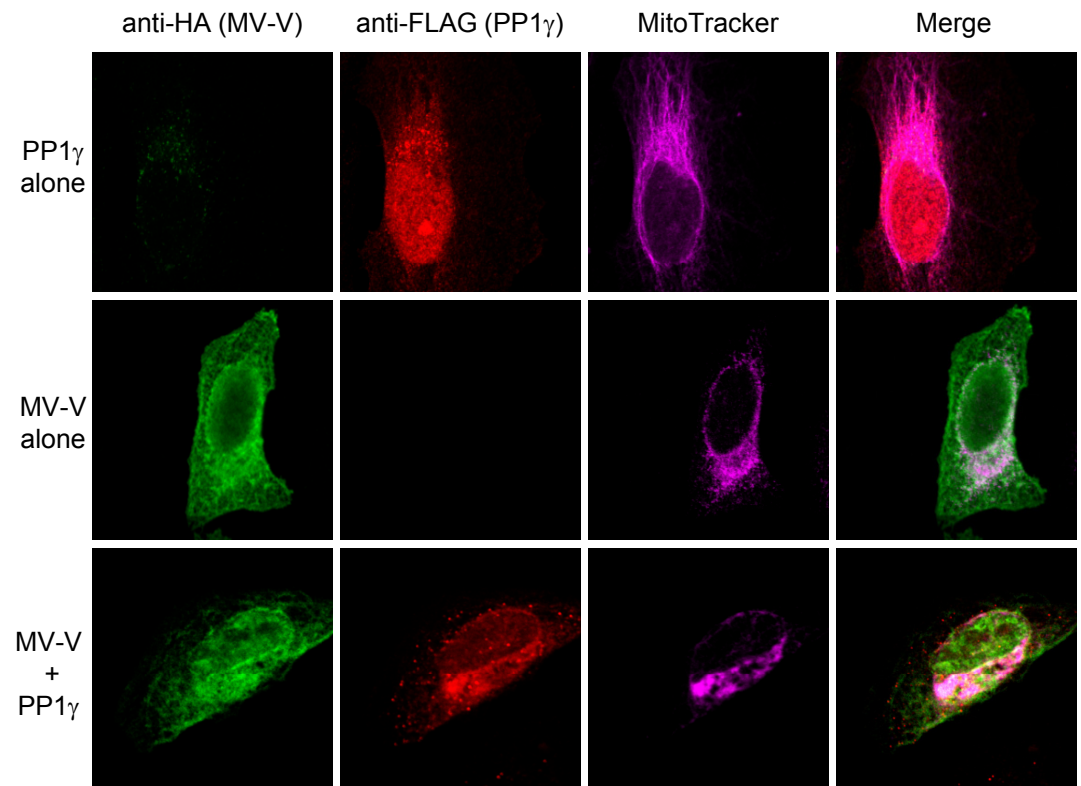

**Figure S2 related to Figure 2. PP1 binding of the paramyxovirus V proteins. (A)** The V proteins of measles and Nipah virus, but not that of PIV5, bind to PP1 $\gamma$ . HEK293T cells were transfected with V5-tagged PP1 $\gamma$  together with vector, HA-tagged MV-V, NiV-V, or PIV5-V protein. PP1 $\gamma$  binding was assessed by IP with anti-HA, followed by IB with anti-V5 antibody. **(B)** The measles V protein and PP1 co-localize at mitochondria-associated membranes (MAM). Confocal scanning laser images of HA-MV-V (green) and FLAG-PP1 $\gamma$  (red) in transfected HeLa cells (as shown in Figure 2C). MAM were stained with MitoTracker (purple).

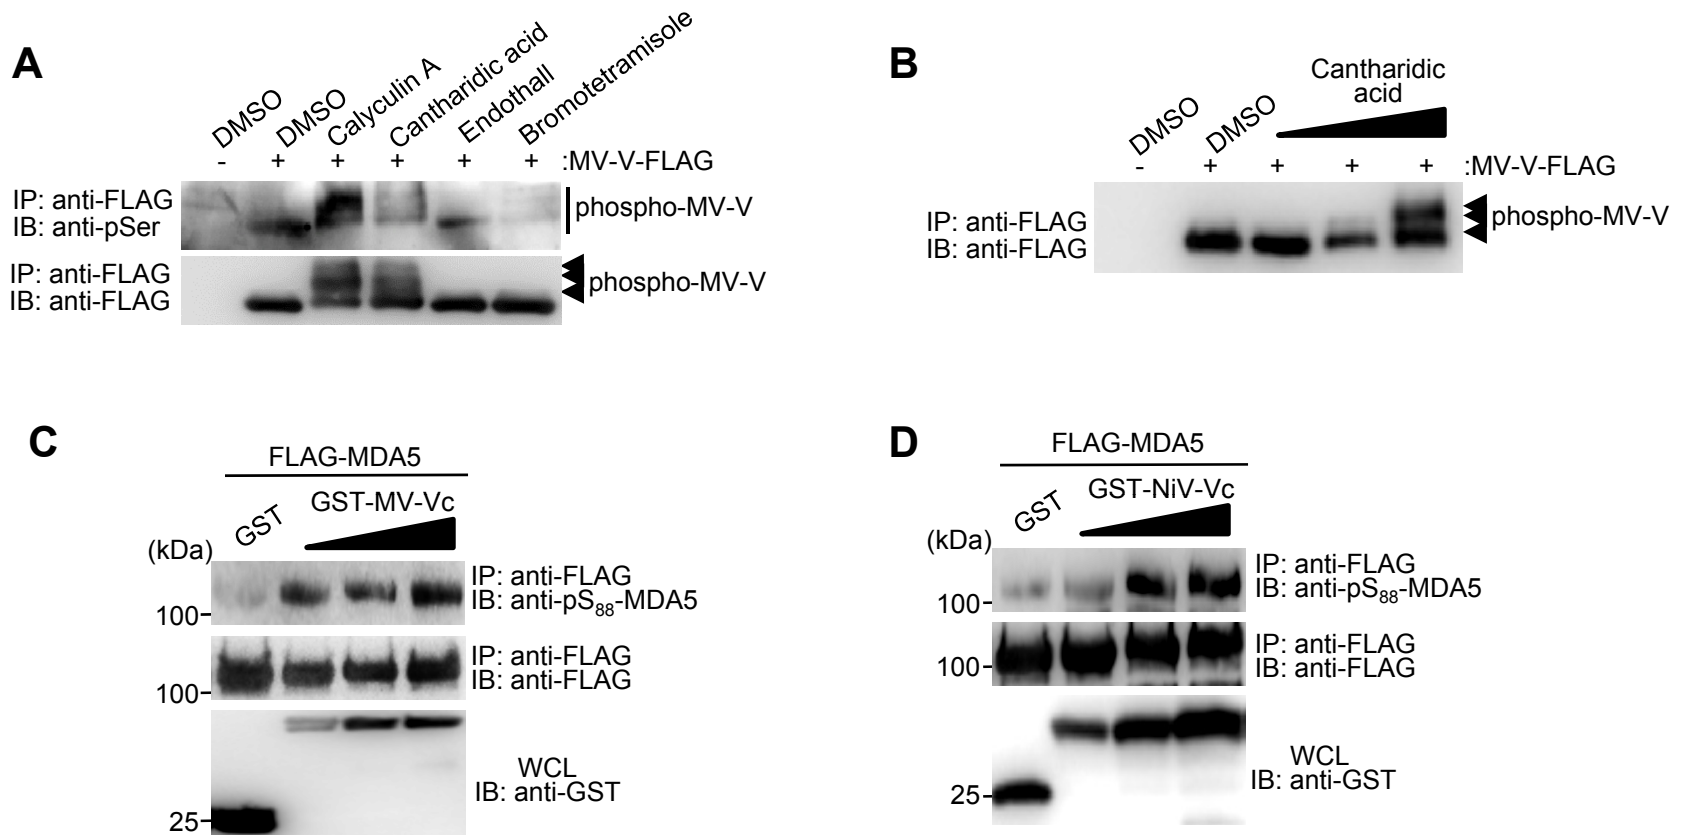

**Figure S3 related to Figures 3 and 4. (A and B) Phosphorylation of the MV-V protein is enhanced by chemical inhibition of PP1. (A)** Phosphorylation of MV-V-FLAG in transfected HEK293T cells treated with the indicated inhibitors (or DMSO control) for 4 h, determined by IB using anti-pan-phospho-Ser antibody (anti-pSer). **(B)** IB analysis of MV-V-FLAG phosphorylation upon treatment with 100 nM, 500 nM, or 1  $\mu$ M of Cantharidic acid for 4 h in transfected HEK293T cells. Arrow heads indicate phosphorylated forms of MV-V. **(C and D) The C-terminal domain of the V protein (V<sub>C</sub>) of measles and Nipah virus is sufficient for preventing MDA5 S88 dephosphorylation.** HEK293T cells were transfected with FLAG-MDA5 together with GST or 4  $\mu$ g, 8  $\mu$ g, or 12  $\mu$ g of GST-fused MV-V<sub>C</sub> **(C)** or NiV-V<sub>C</sub> **(D)**. WCLs were subjected to IP with anti-FLAG antibody, followed by IB with anti-pS<sub>88</sub>-MDA5 or anti-FLAG antibody. Expression of GST and GST-fused V<sub>C</sub> were determined by IB with anti-GST antibody.

|                 |                                                                                                              |
|-----------------|--------------------------------------------------------------------------------------------------------------|
| Edmonston       | <sup>232</sup> HRREISLIWNGDRVFIDRWCNPMCSKVTLG TIRARCTCGECPRVCEQCRTDTGVDT <b>RIWY</b> HNLPEIPE <sup>299</sup> |
| Schwarz         | <sup>232</sup> HRREIGLIWNGDRVFIDRWCNPMCSKVTLG TIRARCTCGECPRVCEQCRTDTGVDT <b>RIWY</b> HNLPEIPE <sup>299</sup> |
| Khartoum Sudan  | <sup>232</sup> HRREISLIWNGDRVFIDRWCNPMCSKVALGTIRARCTCGECPRVCEQCRTDTGVDT <b>RIWY</b> HNLPEIPE <sup>299</sup>  |
| Tokyo.JPN/37.99 | <sup>232</sup> HRREIGLIWNGDRVFIDRWCNPMCSKVTLG TIRARCTCGECPRVCEQCRTDTGVDT <b>RIWY</b> HNLPEIPE <sup>299</sup> |
| T11Ve-23        | <sup>232</sup> HRREIGLIWNGDRVFIDRWCNPMCSKVTLG TIRARCTCGKCPRVCEQCRTDTGVDT <b>RIWY</b> HNLPEIPE <sup>299</sup> |
| IP-3-Ca         | <sup>232</sup> HRREISLIWDGDRVFIDRWCNPMCSKVTLG TIRARCTCGECPRVCEQCRTDTGVDT <b>RIWY</b> HNLPEIPE <sup>299</sup> |
| Yamagata        | <sup>232</sup> HRREISLIWDGDRVFIDRWCNPMCSKVTLG TIRARCTCGECPRVCEQCRTDTGVDT <b>RIWY</b> HNLPEIPE <sup>299</sup> |
| Ichinose-B95a   | <sup>232</sup> HRREIGLIWNGDRVFIDRWCNPMCSKVTLG TIRARCTCGECPRVCEQCRTDTGVDT <b>RIWY</b> HNLPEIPE <sup>299</sup> |
|                 | *****.***:*****:*****:*****                                                                                  |

**Figure S4 related to Figure 4. The PP1-binding motif RIWY is conserved among different measles virus strains.** Vc protein sequence alignment of different MV strains. Alignment was performed using ClustalW2 (<http://www.ebi.ac.uk/Tools/clustalw2/>). Asterisks (\*) indicate positions which have a single, fully conserved residue. Colons (:) indicate conservation between groups of strongly similar properties, and periods (.) indicate conservation between groups of weakly similar properties. The PP1-binding motif is indicated in red. Numbers indicate amino acids.

**A**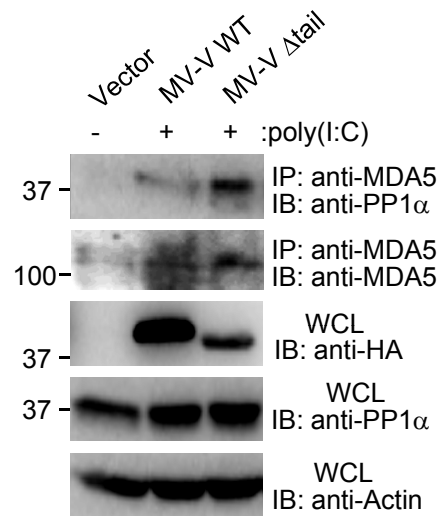**B**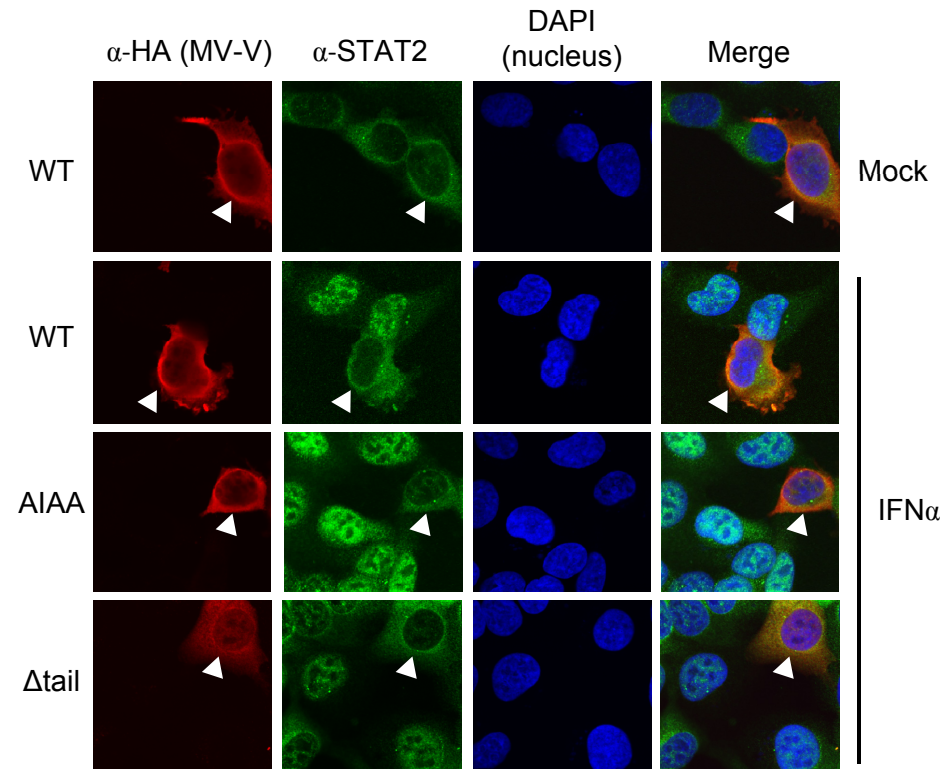

**Figure S5 related to Figure 4. (A) Effect of the MV-V WT and  $\Delta$ tail proteins on endogenous MDA5-PP1 binding stimulated by poly(I:C).** Endogenous MDA5-PP1 binding in Mock-treated or poly(I:C)-stimulated HEK293T cells, transfected with vector or HA-tagged MV-V WT or  $\Delta$ tail, assessed by IP with anti-MDA5, followed by IB with anti-PP1 $\alpha$ . **(B) Mutation or deletion of the PP1-binding motif in the measles V protein does not affect its ability to inhibit the nuclear translocation of STAT2.** Confocal images of 2fTGH cells, that had been transfected with either HA-tagged MV-V WT, MV-V AIAA, or MV-V  $\Delta$ tail, were treated with IFN $\alpha$  for 30 min, or left untreated. Cells were then stained for endogenous STAT2 (green) or HA (MV-V, red). Nuclei were stained with DAPI (blue). Arrow heads indicate cells that show expression of MV-V.

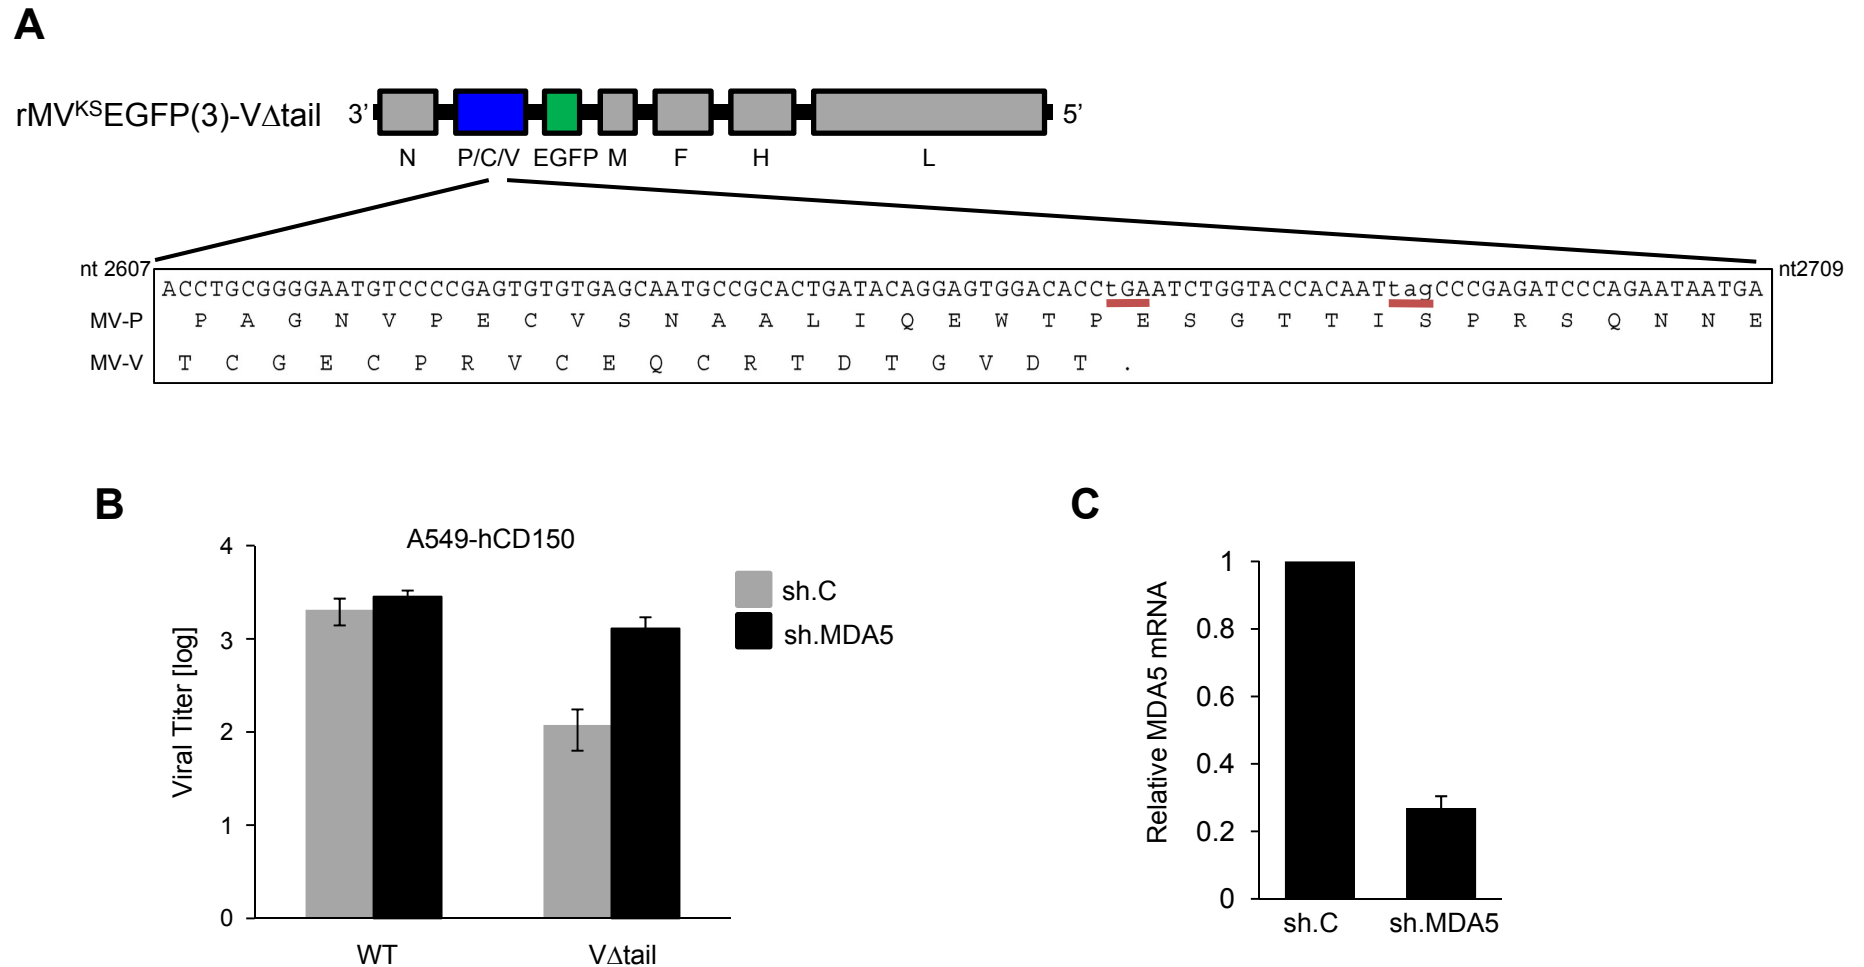

**Figure S6 related to Figure 5. (A) Cloning strategy for the generation of the rMV<sup>KS</sup>EGFP(3)-V $\Delta$ tail virus.** Schematic of rMV<sup>KS</sup>EGFP(3)V $\Delta$ tail (lower inset) nucleotide sequence of mutated region with P and V protein translations showing uninterrupted P sequence and in-frame V stop codons (underlined in red). Mutated nucleotides are shown as lowercase letters. **(B and C) The growth defect of the V $\Delta$ tail virus in A549-hCD150 cells is dependent on its inability to antagonize MDA5.** **(B)** Viral titers of rMV<sup>KS</sup>EGFP(3) WT and V $\Delta$ tail were determined 48 h.p.i. in A549-hCD150 cells, that had been transduced with lentiviral particles expressing MDA5-specific shRNA (sh.MDA5) or non-targeting control shRNA (sh.C). Data are expressed as mean TCID<sub>50</sub>  $\pm$  s.d. (n=2) and are representative of 2 independent experiments. **(C)** Confirmation of MDA5 knockdown from the experiment shown in (B) as determined by qRT-PCR normalized to *gapdh* mRNA levels. The results are expressed as means  $\pm$  s.d. (n=2).
