# Supplementary material
Source: PubMed Central journal article supplement (PMC4120867)
Supplement: NIHMS607477-supplement-02.pdf [file NIHMS607477-supplement-02.pdf]

## Supplemental Information

### Supplemental Experimental Procedures

**Plasmid Construction.** FLAG-MDA5, GST-MDA5 2CARD, MAVS-CARD-PRD-FLAG, HA-PP1 $\alpha$ , HA-PP1 $\beta$ , and HA-PP1 $\gamma$  were previously described (Gack et al., 2007; Wies et al., 2013). pCR3-FLAG-PIV5-V and pCR3-FLAG-MV-V (Schwarz strain) were kindly provided by Karl-Klaus Conzelmann (LMU, Munich) and have been described (Schuhmann et al., 2011). pCAGGS-HA-NiV-V was provided by Chris Basler (Mount Sinai) and has been described (Shaw et al., 2005). FLAG- and V5-tagged PP1 $\gamma$  were subcloned into the pIRES-FLAG and pIRES-V5 vectors, respectively, between *MluI* and *XbaI*. HA-tagged PIV5-V and MV-V genes were subcloned into the pCAGGS plasmid between *EcoRI* and *XhoI*. FLAG-tagged NiV-V was subcloned into pEF-Bos vector containing an N-terminal FLAG tag between *NotI* and *Sall*. GST-MV-V<sub>N</sub> (aa 1-231), GST-MV-V<sub>C</sub> (aa 232-299), GST-NiV-V<sub>N</sub> (aa 1-407), and GST-NiV-V<sub>C</sub> (aa 408-456) were constructed by subcloning into the pEBG vector between *BamHI* and *ClaI*. GST-MV-V<sub>C</sub> and HA-MV-V AIAA mutants were generated through site-directed mutagenesis. GST-MV-V<sub>C</sub> and HA-MV-V  $\Delta$ tail mutants were generated through subcloning residues 232-283 or 1-283 into the pEBG or pCAGGS vector, respectively. All constructs were sequenced to verify 100% agreement with the original sequence.

**Cell Culture and Transfection.** HEK293T, HeLa, 2fTGH, and immortalized MDA5-deficient MEF cells were cultured in Dulbecco's Modified Eagle's Medium (DMEM) supplemented with 10% (v/v) fetal bovine serum (FBS), 2 mM L-glutamine, and 1% (w/v) penicillin-streptomycin (Pen-Strep; Gibco-BRL). Immortalized MDA5-deficient MEFs were described previously (Wies et al., 2013). A549-hCD150 and Vero-hCD150 were cultured in Advanced Modified Eagle's

Medium (MEM) supplemented with 10% (v/v) FBS and 2 mM GlutaMAX (Gibco-BRL). Stable expression of CD150 was maintained in A549-hCD150 and Vero-hCD150 using 500 µg/µL Zeocin (Invitrogen) and 400 µg/µL G418 (Sigma) respectively. Transient transfections were performed with calcium phosphate (Clontech) or Lipofectamine LTX and Plus Reagent (Invitrogen) according to the manufacturer's instructions.

Immature monocyte-derived DCs were cultured as described before (Gringhuis et al., 2009). In short, peripheral blood mononuclear cells, obtained from buffy coats of healthy donors, were isolated by a Lymphoprep (Axis-shield) gradient step and monocytes were subsequently isolated by a Percoll (Amersham biosciences) gradient step. Purified monocytes were differentiated into immature DCs in the presence of 500 U/ml interleukin-4 and 800 U/ml granulocyte-macrophage colony-stimulating factor (Schering-Plough, Brussels, Belgium). DCs were used for experiments at day 6-7.

**Viruses.** MV<sup>Ed</sup> and EMCV (strain EMC) were purchased from ATCC. DenV serotype 2 (strain 16681) was kindly provided by Lee Gehrke (Harvard/MIT). SeV (Cantell strain) was purchased from Charles River Laboratories.

**Generation of an rMV expressing EGFP and a truncated V protein.** rMV<sup>KS</sup>EGFP(3) was generated by insertion of EGFP as an additional transcription unit (Lemon K, 2011; Ludlow et al., 2013a; Ludlow et al., 2013b). The plasmid template for rMV<sup>KS</sup>EGFP(3) was further modified to generate rMV<sup>KS</sup>EGFP(3)VΔtail by exchanging the *AfeI/AscI* fragment with one containing two in-frame stop codons in the sequence encoding the unique C-terminus of the V protein. Sequence changes to introduce the stop codons were designed to be silent in the overlapping P

reading frame. The first stop codon terminates the V protein just before the RIWY motif. Plasmid and primer sequences are available on request. Recombinant viruses were recovered from fowlpox-T7-infected Vero-hCD150 cells transfected with the full-length plasmids along with plasmids expressing MV N, P and L. Virus stocks were grown in B-LCL and tested negative for contamination with mycoplasma species. Virus titers were determined by endpoint titration in Vero-hCD150 cells, and expressed in 50% tissue culture infectious dose (TCID<sub>50</sub>/ml).

**Reagents.** HMV-poly(I:C) complexed with LyoVec was purchased from Invivogen. The following phosphatase inhibitors were used to test MV-V phosphorylation: Calyculin A (25 nM) (Sigma), Cantharidic acid (100 nM, 500 nM, and 1 μM) (Abcam), Endothall (10 μM) (Millipore), and (-)-p-bromotetramisole oxalate (50 μg/mL) (Enzo Life Sciences). Silencing of endogenous MDA5 in A549-hCD150 cells was achieved by transduction of lentiviral particles expressing MDA5-specific shRNAs, or non-targeting control shRNAs (Santa Cruz Biotechnology) following the manufacturer's instructions.

**Quantitative Real-time PCR in DCs.** RNA isolation from primary human DCs was performed by using the mRNA capture kit (Roche Diagnostic Systems). cDNA was synthesized with a reverse transcriptase kit (Promega). For real-time PCR analysis, PCR amplification was performed in the presence of SYBR green in a 7500 Fast Real-time PCR System (ABI). Transcription of the target gene was adjusted for *GAPDH* transcription with  $Nt = 2Ct(GAPDH) - Ct(target)$ . Primers for IFN-β, MxA and ISG15 were kindly provided by C.L. Verweij, VUmc, Amsterdam.

**Confocal Microscopy.** For determining the ability of MV-V WT and mutant proteins to prevent STAT2 nuclear translocation, 2fTGH cells were transfected with Lipofectamine 2000 (Life Technologies) according to the manufacturer's instructions. At 24 h post-transfection, cells were treated with 1000 U/ml IFN $\alpha$ 2 (PBL Biomedical Laboratories) for 30 min. Cells were fixed with 1% paraformaldehyde for 15 min and permeabilized in ice-cold 1:1 methanol/acetone for 10 min at -20 °C. Samples were washed with PBS and blocked with 5% bovine serum in PBS for 30 min. For immunostaining of HA-tagged MV-V proteins and endogenous STAT2, mouse anti-HA (Sigma) and rabbit anti-STAT2 (clone C-20, Santa Cruz) antibodies were used, followed by incubation with goat anti-mouse Alexa-fluor-594 and donkey anti-rabbit Alexa-fluor-488 (Life Technologies), respectively. Laser scanning images were taken on an Olympus IX8I confocal microscope.

## Supplemental References

- Gringhuis, S., den Dunnen, J., Litjens, M., van der Vlist, M., Wevers, B., Bruijns, S., and Geijtenbeek, T. (2009). Dectin-1 directs T helper cell differentiation by controlling noncanonical NF-kappaB activation through Raf-1 and Syk. *Nature immunology* *10*, 203-213.
- Lemon K, d.V.R., Mesman AW, McQuaid S, van Amerongen G, et al (2011). Early target cell of measles virus after aerosol infection of non-human primates. *PLoS pathogens* *7*, e1001263.
- Ludlow, M., de Vries, R.D., Lemon, K., McQuaid, S., Millar, E., van Amerongen, G., Yuksel, S., Verburgh, R.J., Osterhaus, A.D.M.E., de Swart, R.L., *et al.* (2013a). Infection of lymphoid tissues in the macaque upper respiratory tract contributes to the emergence of transmissible measles virus. *Journal of General Virology* *94*, 1933-1944.
- Ludlow, M., Lemon, K., de Vries, R., McQuaid, S., Millar, E., van Amerongen, G., Yuksel, S., Verburgh, R., Osterhaus, A., de Swart, R., *et al.* (2013b). Measles virus infection of epithelial cells in the macaque upper respiratory tract is mediated by subepithelial immune cells. *Journal of virology* *87*, 4033-4042.
- Schuhmann, K., Pfaller, C., and Conzelmann, K.-K. (2011). The measles virus V protein binds to p65 (RelA) to suppress NF-kappaB activity. *Journal of Virology* *85*, 3162-3171.

Shaw, M., Cardenas, W., Zamarin, D., Palese, P., and Basler, C. (2005). Nuclear localization of the Nipah virus W protein allows for inhibition of both virus- and toll-like receptor 3-triggered signaling pathways. *Journal of Virology* 79, 6078-6088.
